# Supplementary material for: Comparing the abundance of HClO in cancer/normal cells and visualizing in vivo using a mitochondria-targeted ultra-fast fluorescent probe
Source: Royal Society of Chemistry journal article supplement (doi:10.1039/d1an00375e), 2021-01-01
Supplement: d1an00375e1.pdf [file d1an00375e1.pdf]

## Support Information

**Fig. S1-S2.** The Structure characterizations of **BB**.

**Fig. S3-S5.** The Structure characterizations of **BBD**.

**Scheme S1** Synthesis route of **BBD**.

**Fig. S6.** The fluorescence intensity of **BBD** and **BBD** toward HOCl under different solvents.

**Fig. S7.** The absorption spectra of **BBD** toward HClO.

**Fig. S8.** The detection limit of **BBD**.

**Fig. S9.** Response time of **BBD** in HClO at different concentrations.

**Fig. S10.** The ESI-MS of **BBD** with HClO.

**Fig. S11.** The cytotoxicity tests of **BBD**.

**Fig. S12.** Time imaging of **BBD** in Hela cells.

**Fig. S13.** Time imaging of **BBD** in HL-7702 cells.

**Table S1.** A comparison of fluorescent probes for HOCl detection.

### 1. Materials

Unless specifically stated, all the chemicals were purchased from commercial suppliers and were used as received without further purification. Deionized water was used throughout all experiments. All test analytes in this experiment were prepared by mixture solid in distilled water or DMSO solution.

### 2. Instruments

A pH meter (Mettler Toledo, Switzerland) was used to determine the pH. Reaction processes were monitored on thin layer chromatography (TLC). Ultraviolet-visible (UV-vis) spectra were measured on a Hitachi U-3900 UV-vis spectrophotometer. Fluorescence spectra were performed on Hitachi F-7000 fluorescence spectrophotometer. A PO-120 quartz cuvette (10 mm) was purchased from Shanghai Huamei Experiment Instrument Plants, China. Synthetic intermediates and probes were characterized by  $^1\text{H}$  NMR and  $^{13}\text{C}$  NMR using a Bruker AVANCE-600 MHz spectrometer and 150 MHz NMR spectrometer. The final bioimaging application were measured the Zeiss LSM880 Airyscan confocal laser scanning microscope.

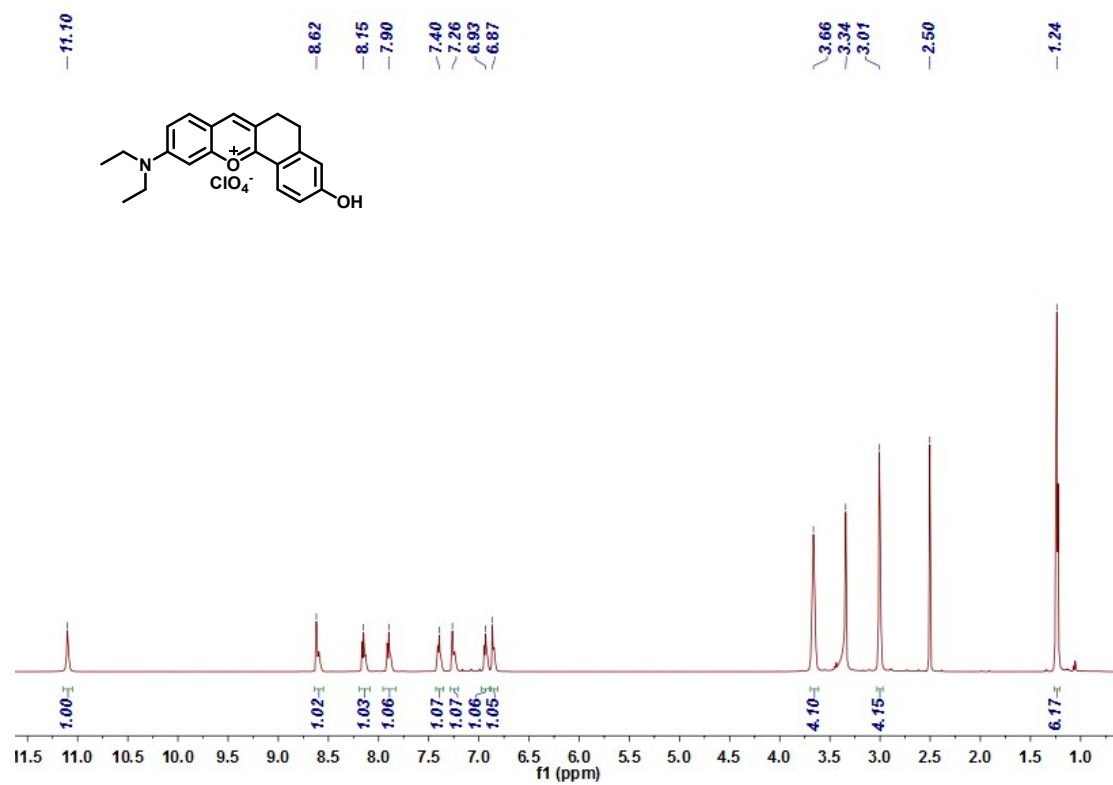

**Fig. S1.**  $^1\text{H}$  NMR (600 MHz) of **BB** in  $\text{DMSO}-d_6$ .

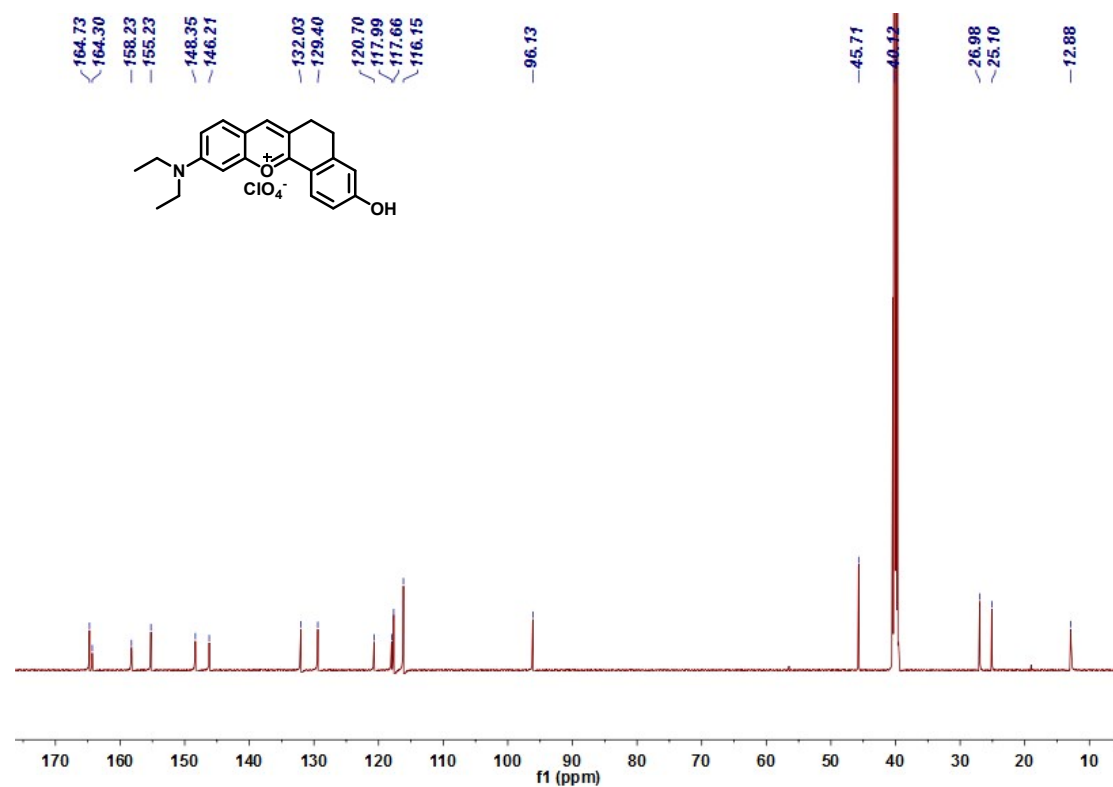

**Fig. S2.**  $^{13}\text{C}$  NMR (151 MHz) of **BB** in  $\text{DMSO}-d_6$ .

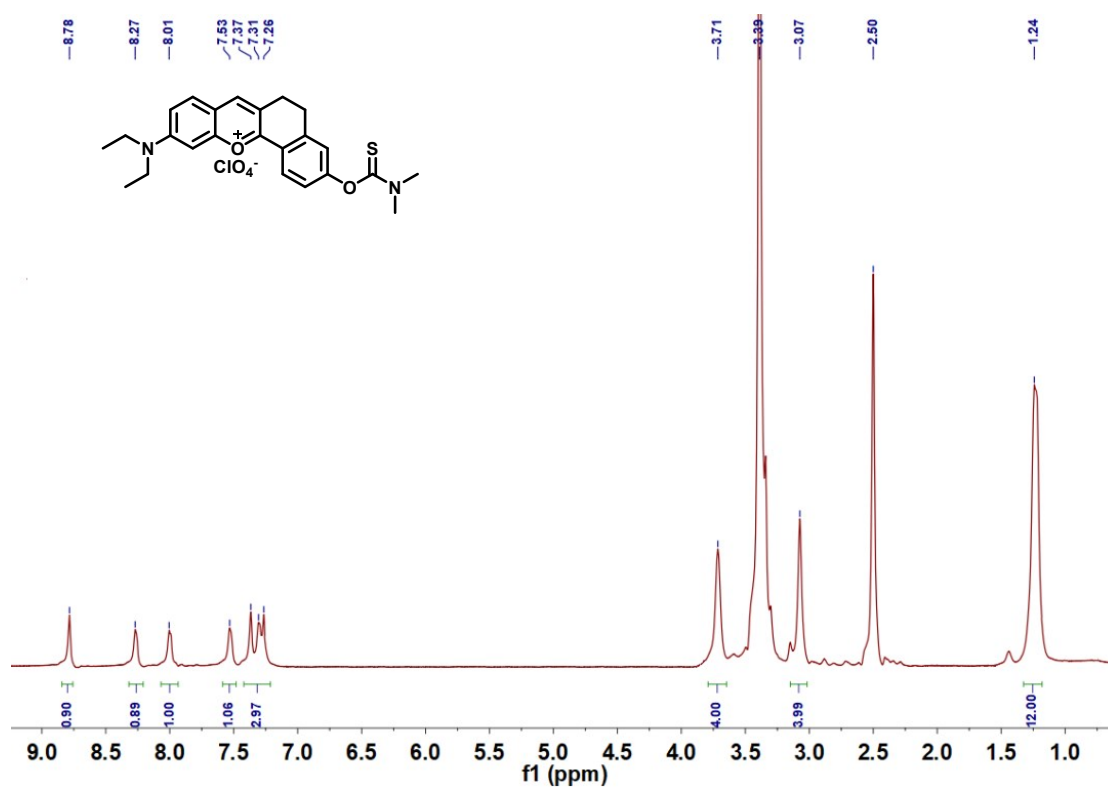

**Fig. S3.**  $^1\text{H}$  NMR (600 MHz) of **BBD** in  $\text{DMSO}-d_6$ .

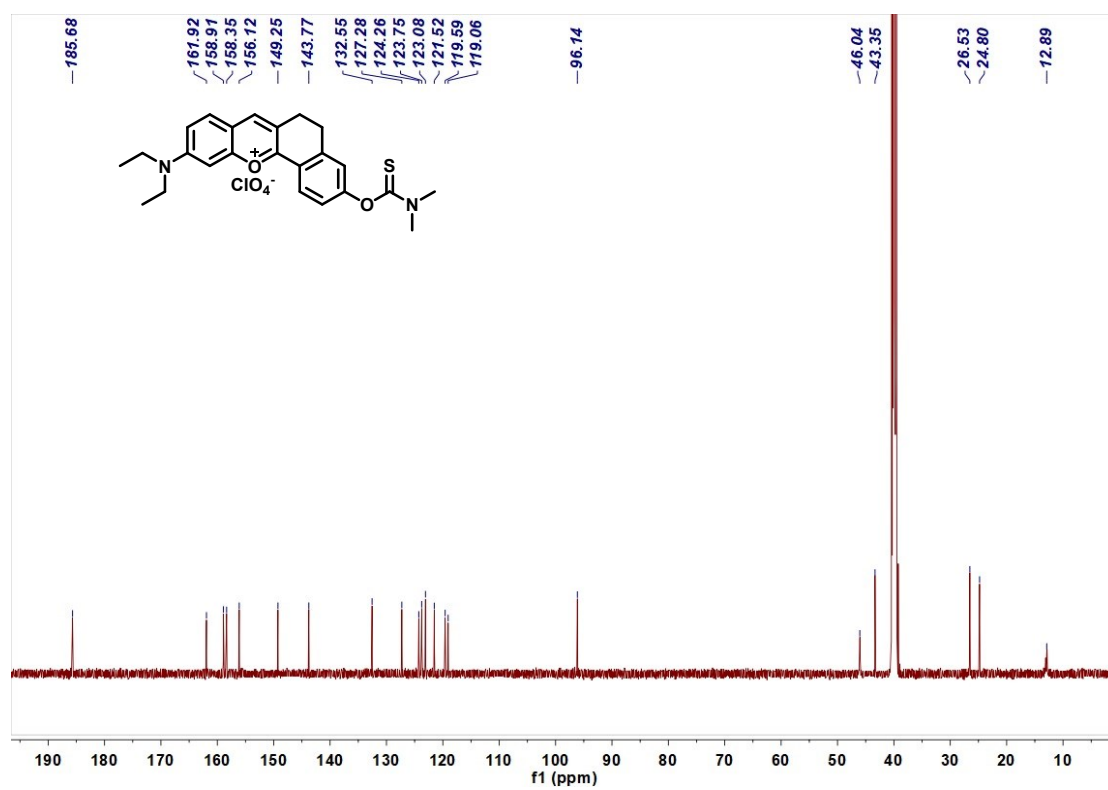

**Fig. S4.**  $^{13}\text{C}$  NMR (151 MHz) of **BBD** in  $\text{DMSO}-d_6$ .

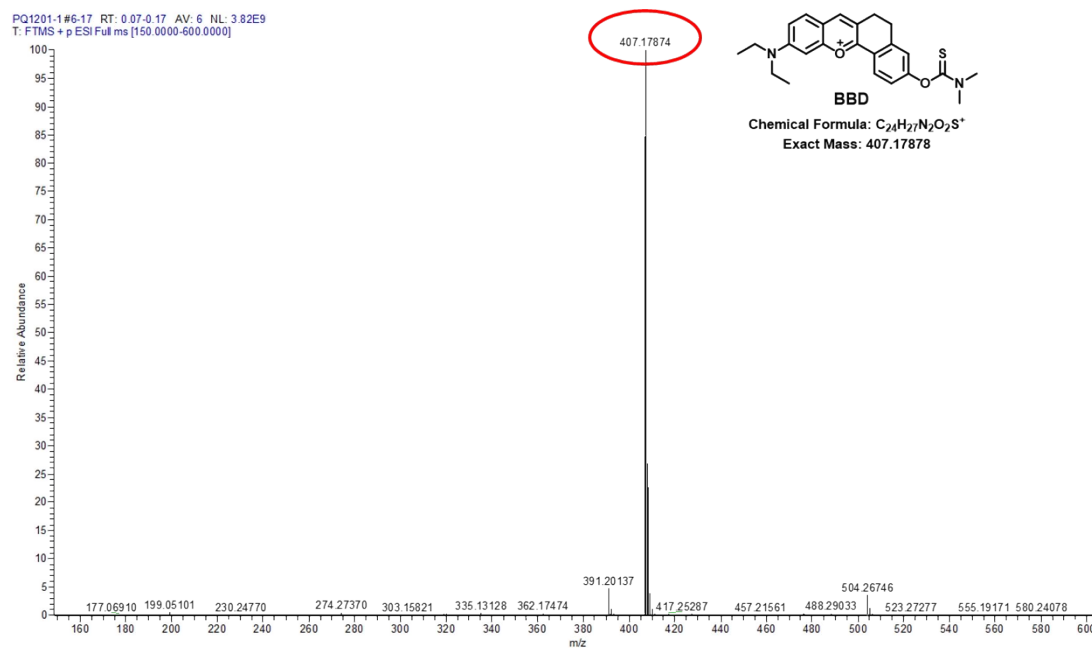

**Fig. S5.** The HR-MS spectrum of **BBD**.

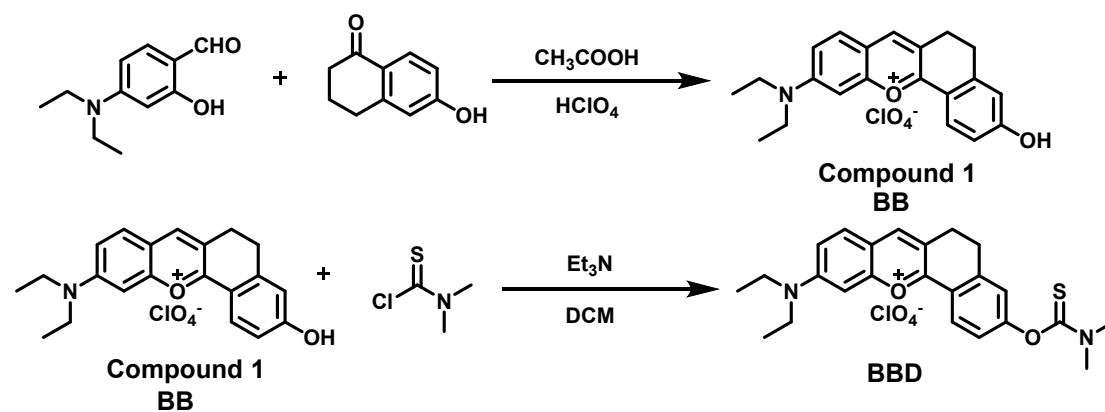

**Scheme S1** Synthesis route of **BBD**.

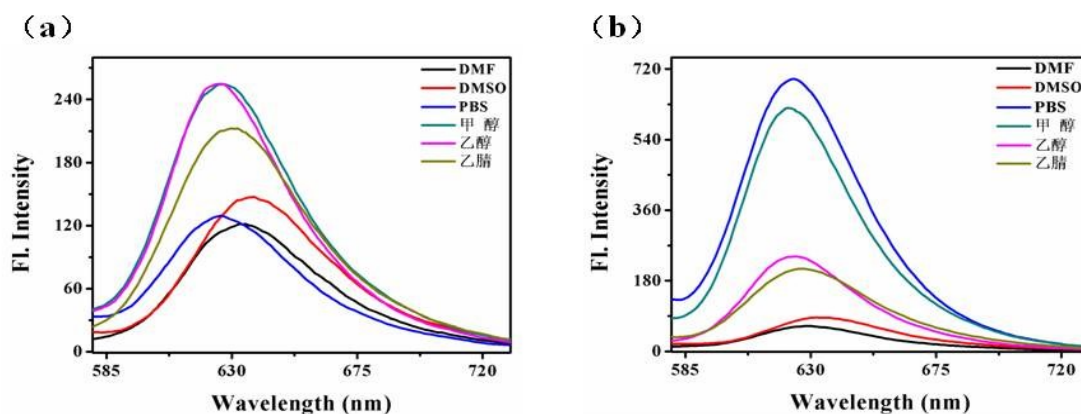

**Fig. S6.** (a) The fluorescence intensity of *BBD* (10  $\mu\text{M}$ ) in different solvents; (b) The fluorescence intensity of *BBD* (10  $\mu\text{M}$ ) toward HClO (310  $\mu\text{M}$ ) in different solvents.

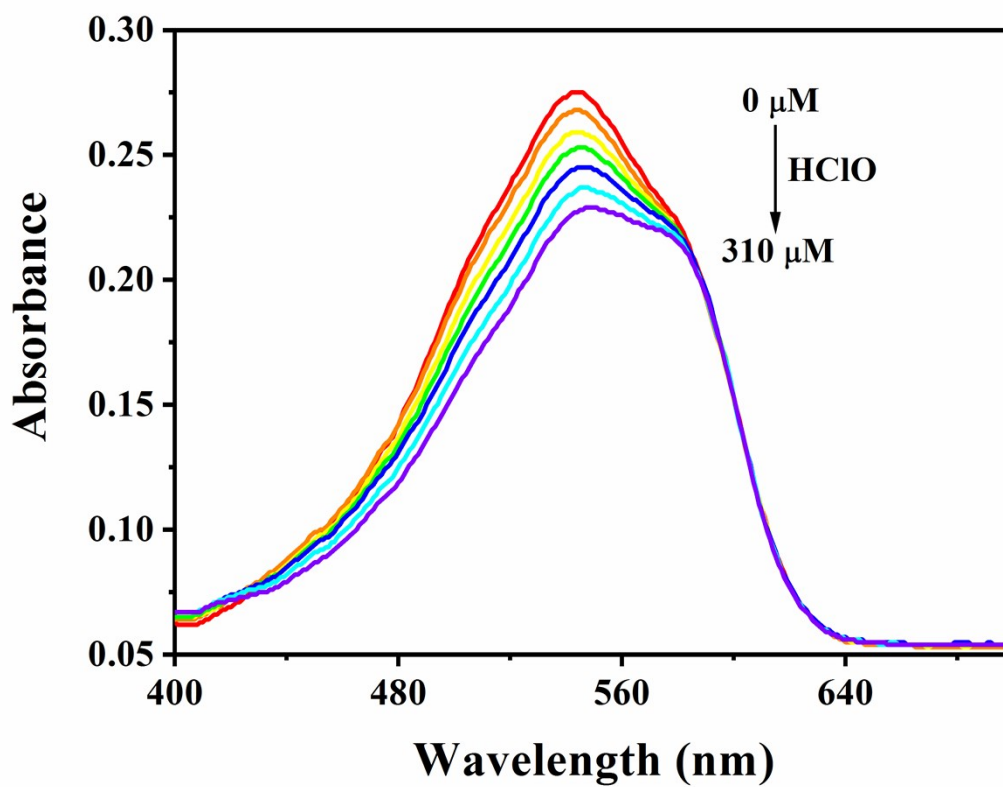

**Fig. S7.** The absorption spectra of *BBD* (10  $\mu\text{M}$ ) toward HClO (0-310  $\mu\text{M}$ ).

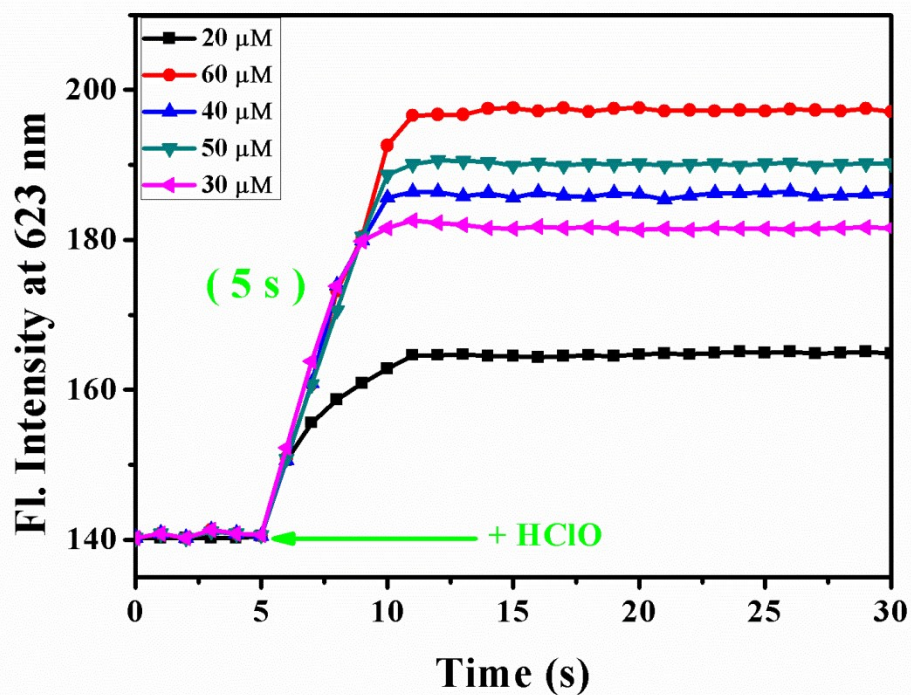

Fig. S8. Response time of *BBD* in  $\text{HClO}$  at different concentrations (20-60  $\mu\text{M}$ ).

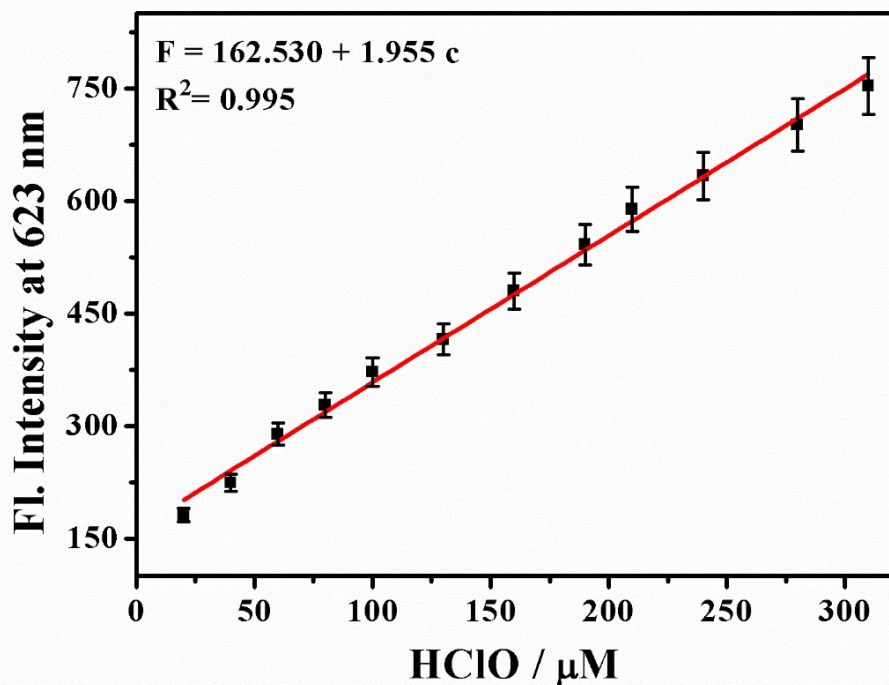

Fig. S9. The detection limit of *BBD* for  $\text{HClO}$ .

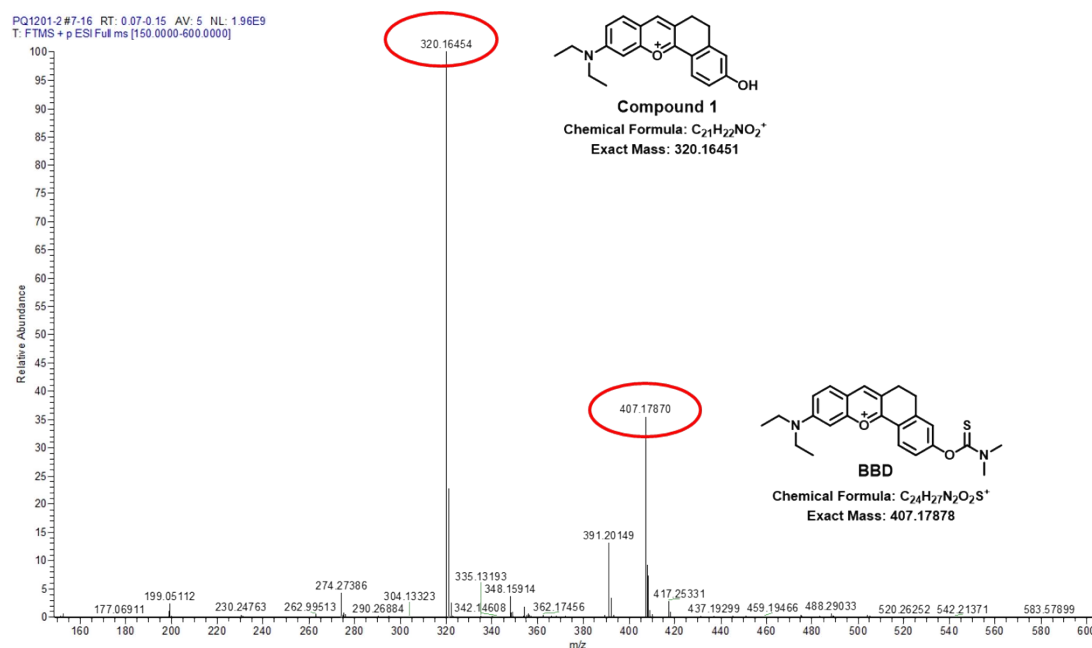

**Fig. S10.** The HR-MS spectrum of [*BBD*+HClO].

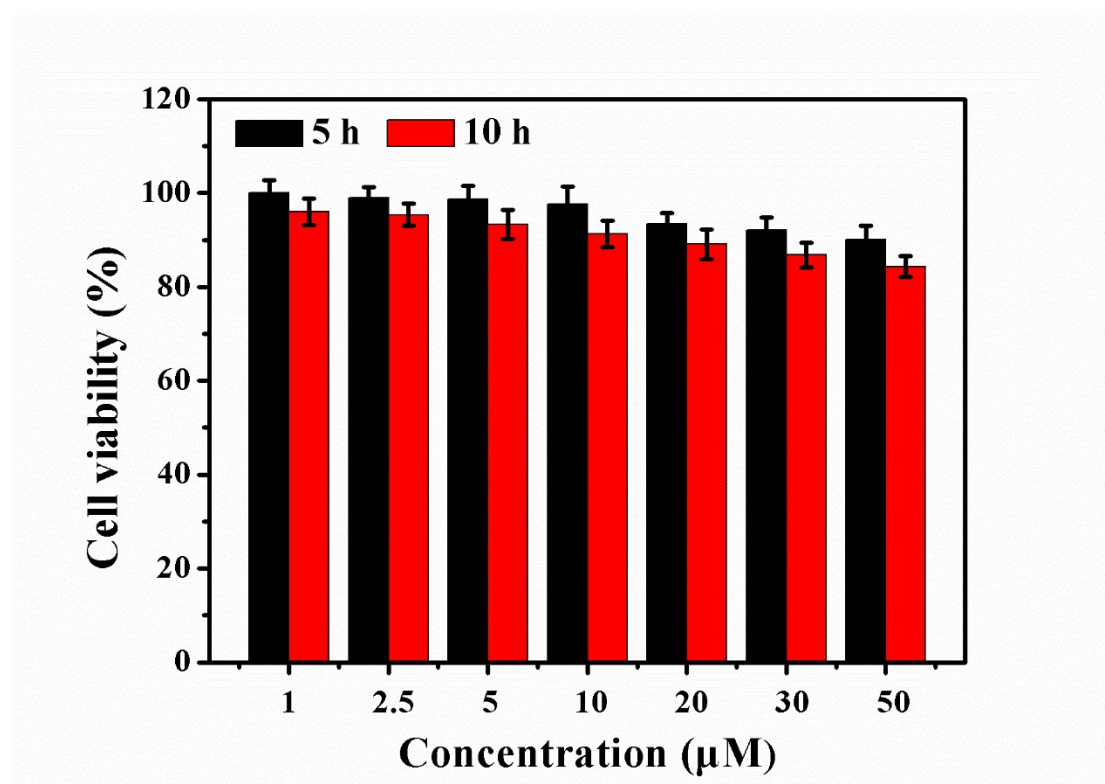

**Fig. S11.** The cytotoxicity tests of *BBD*.

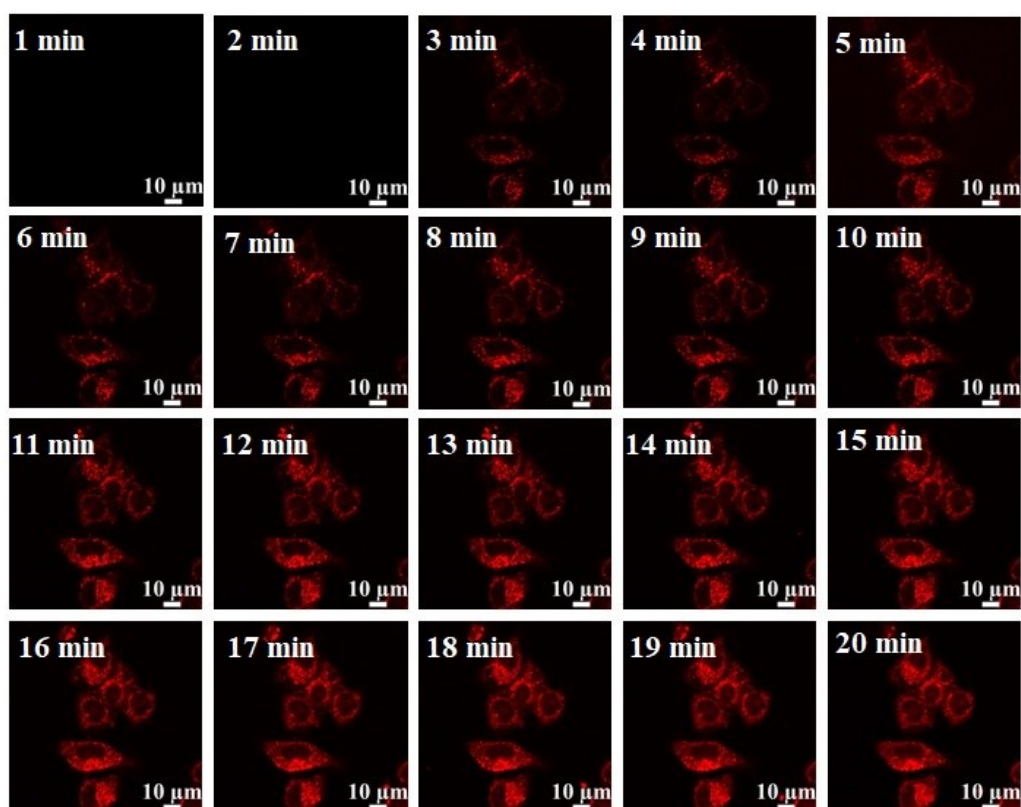

**Fig. S12.** The time-dependent images of *BBD* (10  $\mu$ M) incubated HeLa cells every 1 min (from 0 to 20 min). ( $\lambda_{\text{ex}} = 561$  nm,  $\lambda_{\text{em}} = 600$ -650 nm).

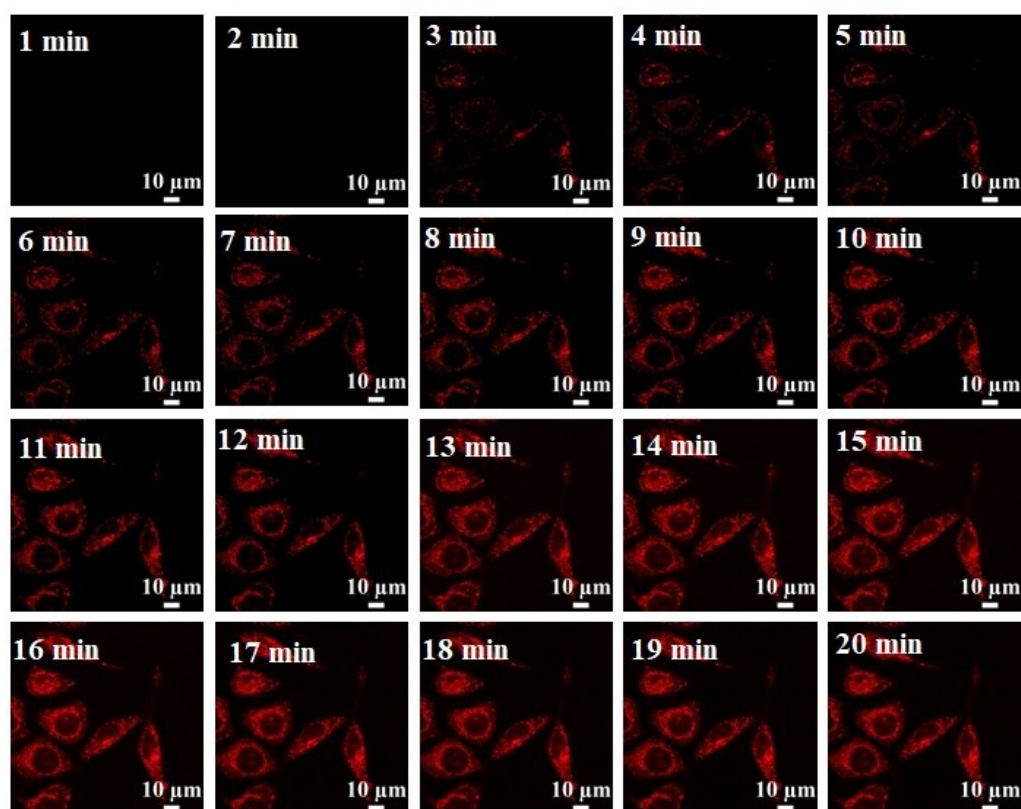

**Fig. S13.** The time-dependent images of **BBD** (10  $\mu$ M) incubated HL-7702 cells every 1 min (from 0 to 20 min). ( $\lambda_{\text{ex}}$  = 561 nm,  $\lambda_{\text{em}}$  = 600-650 nm).

| Probe                                                                               | $\lambda_{\text{ex}}/\lambda_{\text{em}}$<br>nm | Detection<br>time | Targeted<br>organelles | Test<br>system                               | Detection<br>limit | Ref. |
|-------------------------------------------------------------------------------------|-------------------------------------------------|-------------------|------------------------|----------------------------------------------|--------------------|------|
| 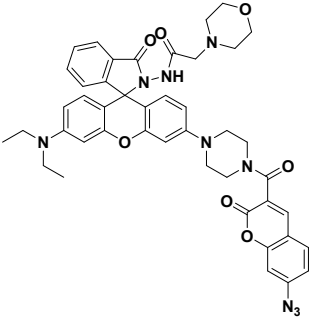   | 550/<br>580                                     | 3 s               | Lysosome               | PBS                                          | 73 pM              | 26   |
| 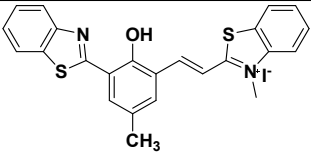  | 450/<br>670                                     | 5 min             | Mitochondria           | PBS<br>:CH <sub>3</sub> CN<br>=1:1           | 0.13 $\mu$ M       | 27   |
| 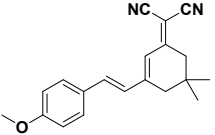 | 370/<br>570                                     | 2 min             | No                     | DMSO:PBS<br>=1:1                             | 0.84 $\mu$ M       | 28   |
| 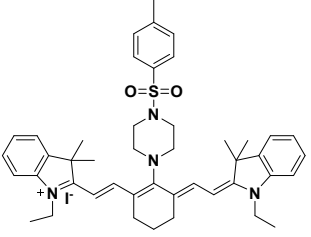 | 760/<br>735                                     | 20 s              | No                     | H <sub>2</sub> O:CH <sub>3</sub> O<br>H =1:1 | 1.165 $\mu$ M      | 29   |
| 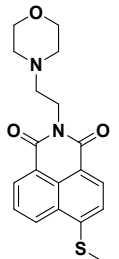 | 405/<br>505                                     | 2.5 min           | Lysosome               | PBS                                          | 0.674 $\mu$ M      | 30   |
| 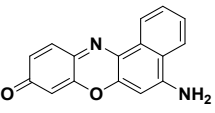 | 580/<br>626                                     | 10 min            | No                     | PBS                                          | 72 nM              | 31   |

|                                                                                   |             |              |              |                      |              |           |
|-----------------------------------------------------------------------------------|-------------|--------------|--------------|----------------------|--------------|-----------|
| 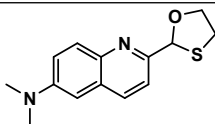 | 426/<br>562 | <1 min       | No           | PBS:DMF<br>=19:1     | 89 nM        | 32        |
| 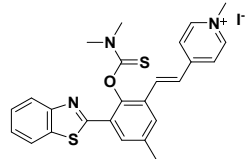 | 400/<br>630 | 4 s          | Mitochondria | MeOH : water = 1 : 4 | 0.47 $\mu$ M | 33        |
| 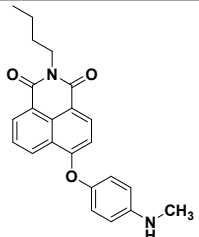 | 460/<br>550 | within 1 min | No           | PBS:ethanol<br>=9:1  | 6.56 nM      | 34        |
| 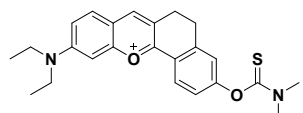 | 567/<br>623 | 5 s          | Mitochondria | PBS                  | 5.8 $\mu$ M  | This work |

**Table S1** A comparison of fluorescent probes for HOCl detection.
